# Supplementary material for: Mechanochemical Pretreated Mn+1AXn (MAX) Phase to Synthesize 2D-Ti3C2Tx MXene Sheets for High-Performance Supercapacitors
Source: MDPI journal article supplement (doi:10.3390/nano13111741), 2023-05-26
Supplement: s1 [file s1]

# Supplementary Materials

**Table S1.** Synthesis details of 2D layered MXenes from MAX phases.

| S. No                 | Synthesis Process<br>(Ball Milling+ Chemical Etching) | Abbreviation |
|-----------------------|-------------------------------------------------------|--------------|
| 1                     | 6 h Ball Milled MAX phase                             | BMAX-6H      |
| 2                     | 6 h Ball milled and 12 h etched and dried at 60°C     | BM-12H       |
| 3                     | 12h etched and dried at 60°C                          | M-12H        |
| 4                     | 24h etched and dried at 60°C                          | M-24H        |
| 5                     | 48h etched and dried at 60°C                          | M-48H        |
| <i>Etching By HF.</i> |                                                       |              |

## Calculation of electrochemical parameters:

The electrochemical parameters, such as the specific capacitance ( $C_s$ , Fg<sup>-1</sup>), Coulombic efficiency ( $\eta$ ), energy (E), and power density (P) are important parameters for the investigation of the capacitive behavior of electrochemical cells.

Calculation of specific capacitance for three electrode system:

In order to evaluate the performances of the cells, the specific capacitances for the electrodes were tested in three-electrode system. The specific gravimetric capacitance (Fg<sup>-1</sup>) for the three-electrode setup was calculated from galvanostatic charging and discharging (GCD) curves using the equation 1:

$$C_{sc}(F\ g^{-1}) = \frac{I\Delta t}{\Delta V m} \quad (1)$$

where, I is the discharge (or charge) current,  $\Delta t$  is the discharge (or charge) time,  $\Delta V$  is the potential window of cycling, and m is the mass loaded on carbon cloth substrate.

## Specific capacitance for two electrode cell:

The gravimetric capacitance for symmetric supercapacitor was calculated from galvanostatic charge/discharge curves using the equation 2:

$$CSC(F\ g^{-1}) = \frac{2I\Delta t}{\Delta V m} \quad (2)$$

where Csc (F g<sup>-1</sup>) is the gravimetric specific capacitance, i (A) is the discharge current,  $\Delta t$  (s) is the discharge time,  $\Delta V$  is the potential window (excluding the IR drop), and m in gram is the mass of the active material.

## Power and energy density calculations:

The power density (P) of the symmetric supercapacitor was calculated from the energy density (E) and the discharge time (t) according to the Equations (3) and (4)

$$E_{cell} = \frac{1}{2} C_{sc} \Delta V^2 \cdot \frac{1}{4 * 3.6} \quad (3)$$

$$P_{cell} = \frac{E_{cell}}{\Delta t} \quad (4)$$

where E is the energy density ( $\text{Wh kg}^{-1}$ ), C is the measured device capacitance ( $\text{Fg}^{-1}$ ) calculated using eq (2), V is the potential window (V), P is the power density ( $\text{W kg}^{-1}$ ), and  $\Delta t$  is the discharge (or charge) time (s) from the CD curves.

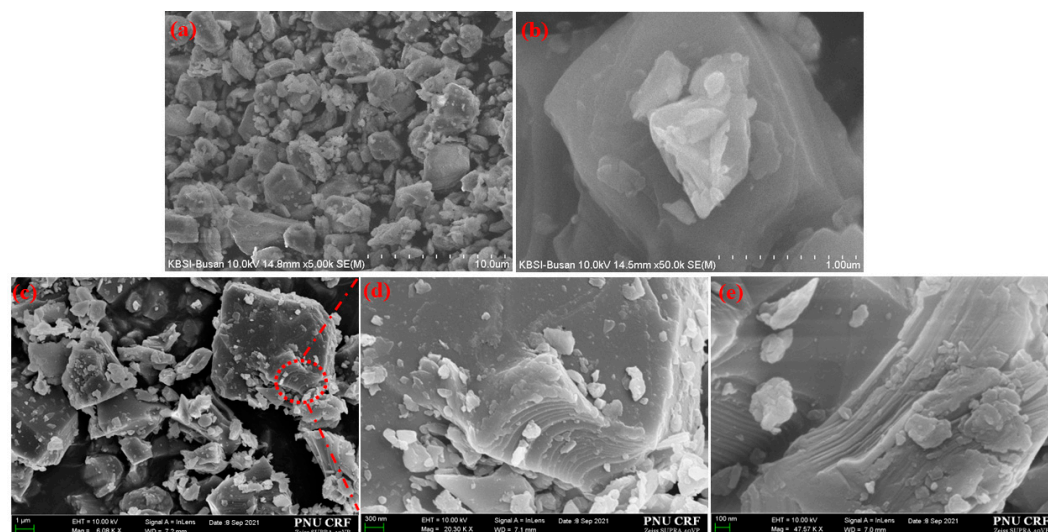

**Figure S1.** FESEM images of (a and b) pristine  $\text{Ti}_3\text{AlC}_2$ , (c, d, e) Ball milled MAX phase at low and high magnification.

**Table S2.** The comparison of MXene electrode supercapacitor's various parameters in 3 electrode system with aqueous electrolyte.

| No. | Material                                       | Electrolyte                | Potential Window(V) | Specific Capacitance ( $\text{F g}^{-1}$ ) | Ref       |
|-----|------------------------------------------------|----------------------------|---------------------|--------------------------------------------|-----------|
| 1   | $\text{Ti}_3\text{C}_2$                        | 1M NaCl                    | 1.2                 | 127.6 at $0.1 \text{ A g}^{-1}$            | [1]       |
| 2   | $\text{Ti}_3\text{C}_2/\text{TiO}_2$ -nanowire | 6M KOH                     | 0.6                 | 135 at $5 \text{ mV/s}$                    | [2]       |
| 3   | $\text{Ti}_3\text{C}_2$                        | 0.5M NaCl                  | 1.2                 | 132 at $0.1 \text{ A g}^{-1}$              | [3]       |
| 4   | $\text{Ti}_3\text{C}_2$                        | 1M NaCl                    | 0.9                 | 75.76 at $0.1 \text{ A g}^{-1}$            | [4]       |
| 5   | $\text{Ti}_3\text{C}_2$                        | 1M $\text{H}_2\text{SO}_4$ | 0.5                 | 105.8 at $1 \text{ A g}^{-1}$              | [5]       |
| 6   | $\text{Ti}_3\text{C}_2$                        | 3M KOH                     | 0.8                 | 141.45 at $0.4 \text{ A g}^{-1}$           | [6]       |
| 7   | $\text{Ti}_3\text{C}_2$                        | 3M KOH                     | 0.8                 | 146.25 at $0.5 \text{ A g}^{-1}$           | This work |

**Table S3.** Surface Area, Pore Size, and Pore Volume Data.

| MXene Samples | SSA ( $\text{m}^2 \text{ g}^{-1}$ ) <sup>a</sup> | Pore Volume ( $\text{cm}^3 \text{ g}^{-1}$ ) <sup>a</sup> | Pore diameter (nm) <sup>a</sup> |
|---------------|--------------------------------------------------|-----------------------------------------------------------|---------------------------------|
| BMAX-6H       | 8.57                                             | 0.02                                                      | -                               |
| BM-12H        | 32.8                                             | 0.24                                                      | 7.6                             |
| M-24H         | 23.7                                             | 0.13                                                      | 22.1                            |
| M-48H         | 17.28                                            | 0.08                                                      | 24.8                            |

**Table S4.** The impedance parameters derived by equivalent circuit model.

| Electrode | $R_s(\Omega)$ | $R_{SEI}(\Omega)$ | $Q_1(\mu F)$ | $R_{ct}(\Omega)$ | $Q_2(\mu F)$ | $Z_w(\Omega s^{-1/2})$ |
|-----------|---------------|-------------------|--------------|------------------|--------------|------------------------|
| M-24H     | 0.64          | 0.56              | 23.23        | 0.43             | 335          | 1.63                   |
| M-48H     | 0.74          | 8.68              | 5670         | 0.65             | 24.23        | 9.12                   |
| BM-12H    | 0.7           | 0.40              | 27.01        | 0.33             | 668          | 1.31                   |

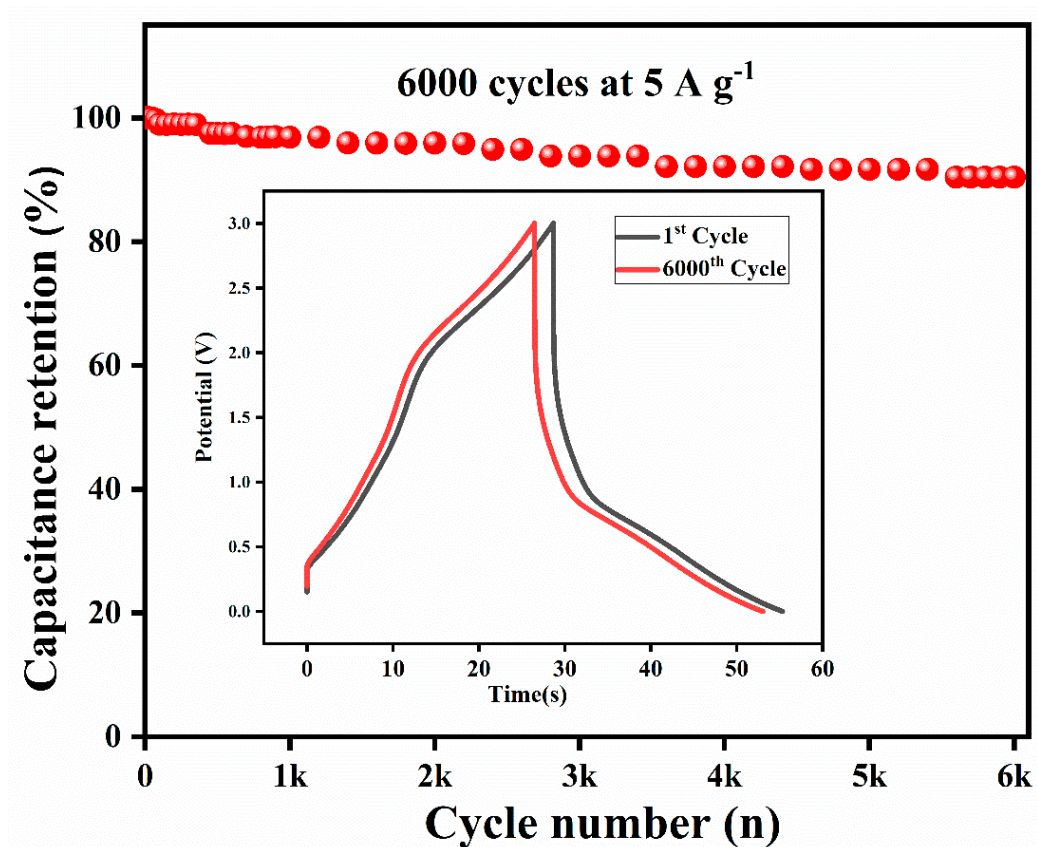

**Figure S2.** Cyclic stability of MXene coin cell at current density of  $5 \text{ A g}^{-1}$ .

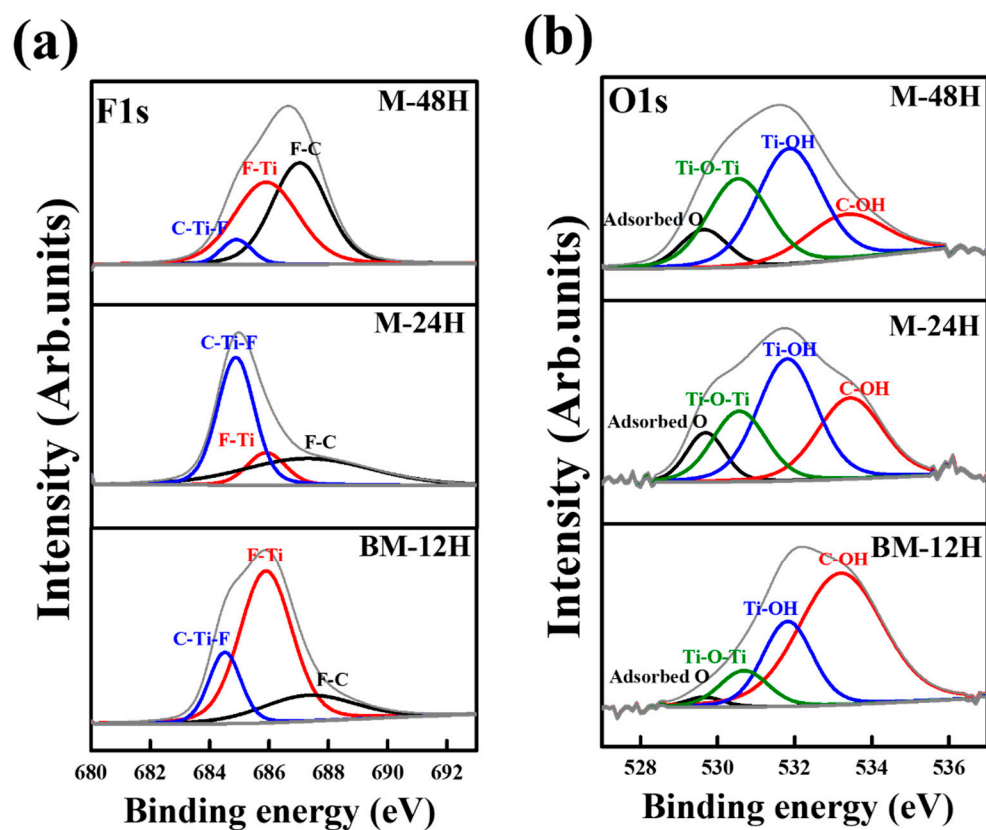

Figure S3. XPS fitting of (a)F1s and (b)O1s for M-48H, M-24, BM-12H.

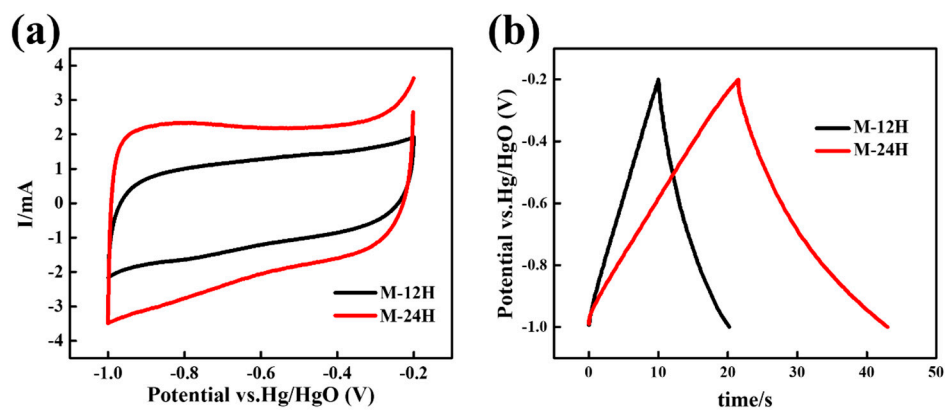

Figure S4. Comparison in (a) CV and (b) GCD for M-12H and M-24H.

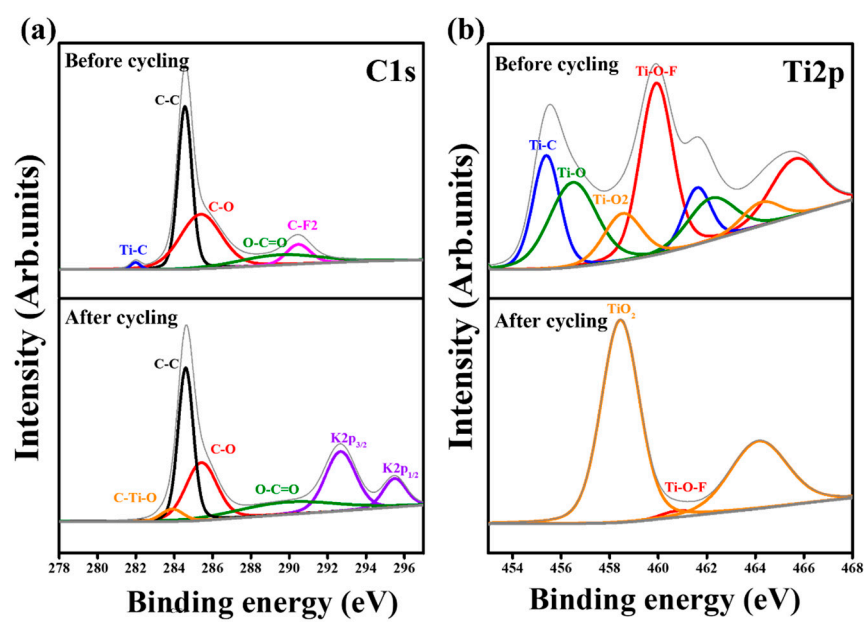

**Figure S5.** Comparison of XPS spectra in (a)C1s and (b)Ti2p before and after cycling tested BM-12H electrode.

## References

1. Ma, J.; Cheng, Y.; Wang, L.; Dai, X.; Yu, F. Free-Standing Ti<sub>3</sub>C<sub>2</sub>T<sub>x</sub> MXene Film as Binder-Free Electrode in Capacitive Deionization with an Ultrahigh Desalination Capacity. *Chemical Engineering Journal* **2020**, *384*, doi:10.1016/j.cej.2019.123329.
2. Cao, M.; Wang, F.; Wang, L.; Wu, W.; Lv, W.; Zhu, J. Room Temperature Oxidation of Ti<sub>3</sub>C<sub>2</sub> MXene for Supercapacitor Electrodes. *J Electrochem Soc* **2017**, *164*, A3933–A3942, doi:10.1149/2.1541714jes.
3. Srimuk, P.; Kaasik, F.; Krüner, B.; Tolosa, A.; Fleischmann, S.; Jäckel, N.; Tekeli, M.C.; Aslan, M.; Suss, M.E.; Presser, V. MXene as a Novel Intercalation-Type Pseudocapacitive Cathode and Anode for Capacitive Deionization. *J Mater Chem A Mater* **2016**, *4*, 18265–18271, doi:10.1039/c6ta07833h.
4. Buczek, S.; Barsoum, M.L.; Uzun, S.; Kurra, N.; Andris, R.; Pomerantseva, E.; Mahmoud, K.A.; Gogotsi, Y. Rational Design of Titanium Carbide MXene Electrode Architectures for Hybrid Capacitive Deionization. *Energy and Environmental Materials* **2020**, *3*, 398–404, doi:10.1002/eem2.12110.
5. Hou, W.; Sun, Y.; Zhang, Y.; Wang, T.; Wu, L.; Du, Y.; Zhong, W. Mixed-Dimensional Heterostructure of Few-Layer MXene Based Vertical Aligned MoS<sub>2</sub> Nanosheets for Enhanced Supercapacitor Performance. *J Alloys Compd* **2021**, *859*, doi:10.1016/j.jallcom.2020.157797.
6. Cho, I.; Selvaraj, A.R.; Bak, J.; Kim, H.; Prabakar, K. Anomalous Increase in Specific Capacitance in MXene during Galvanostatic Cycling Studies. *J Energy Storage* **2022**, *53*, 105207, doi:10.1016/j.est.2022.105207.
